# Supplementary material for: Climate change in Upper East Region of Ghana; challenges existing in farming practices and new mitigation policies
Source: publisher site journal article supplement (doi:10.1515/opag-2018-0057), 2018-12-31

## Supplementary Materials

High rate of wildfire destroying forest

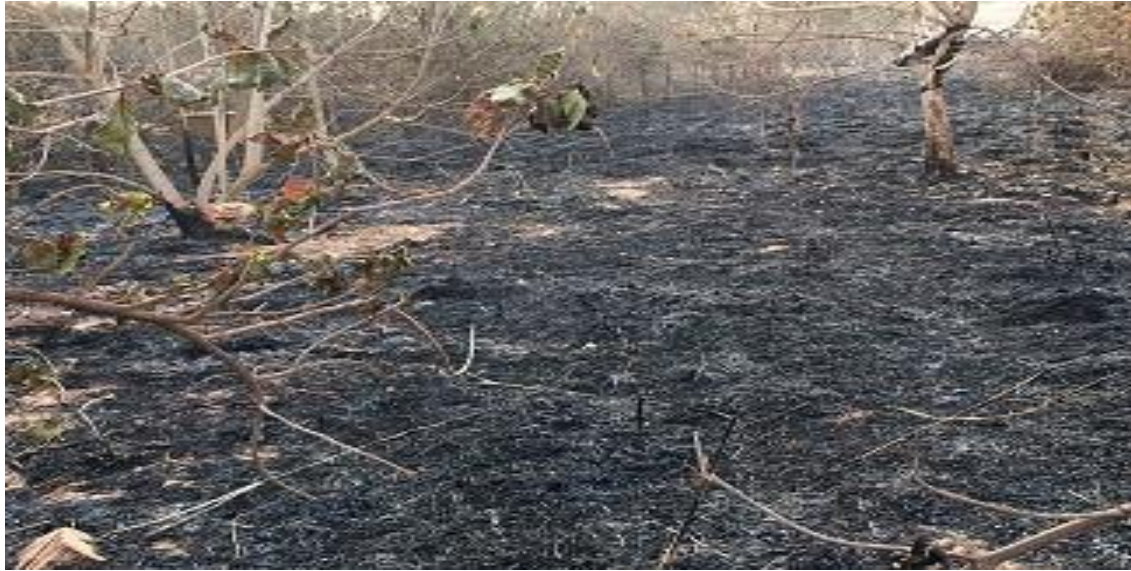

Cutting down trees for firewood

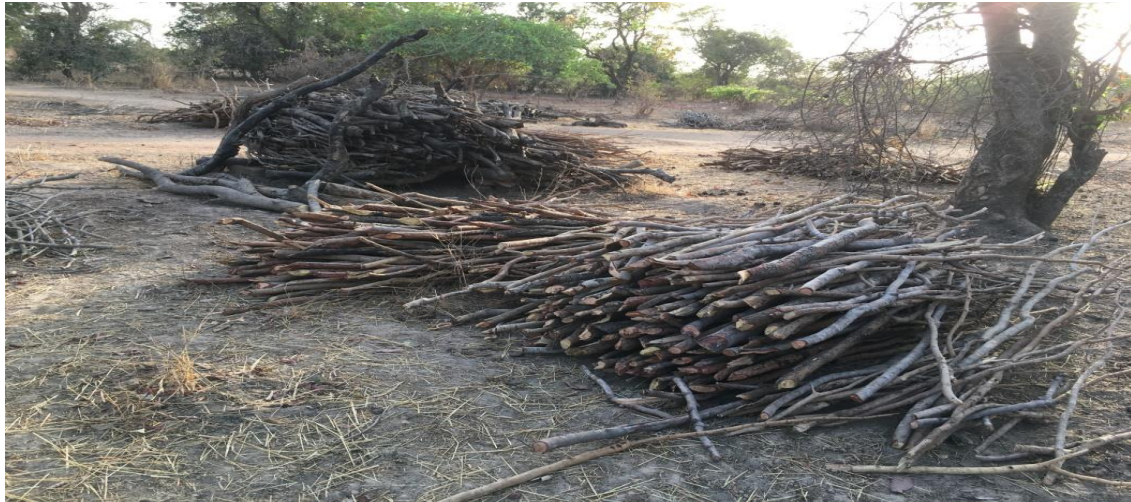

Dry season gardening for adaptation

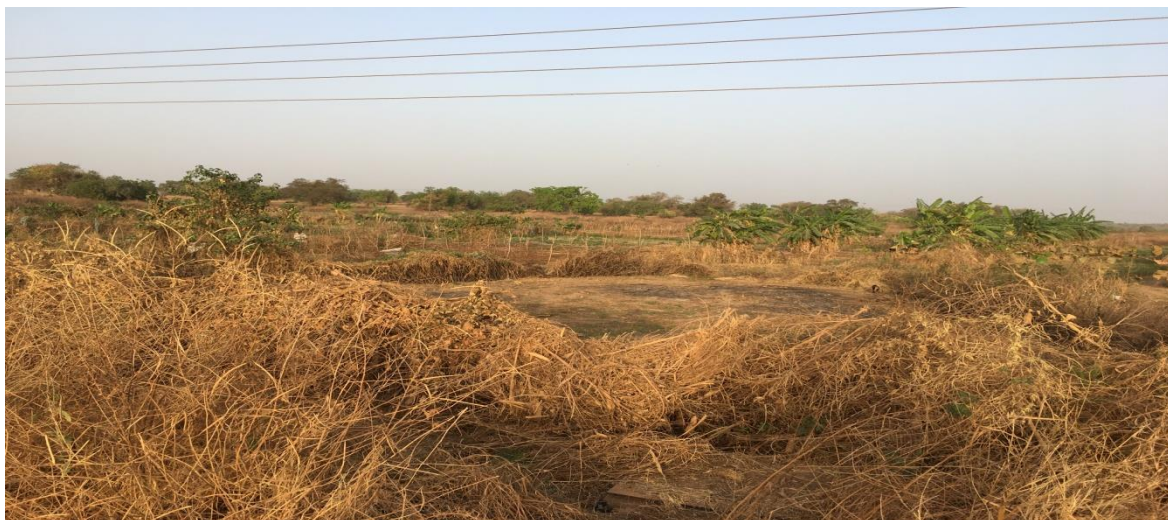

Manual Stone quarry for adaptation

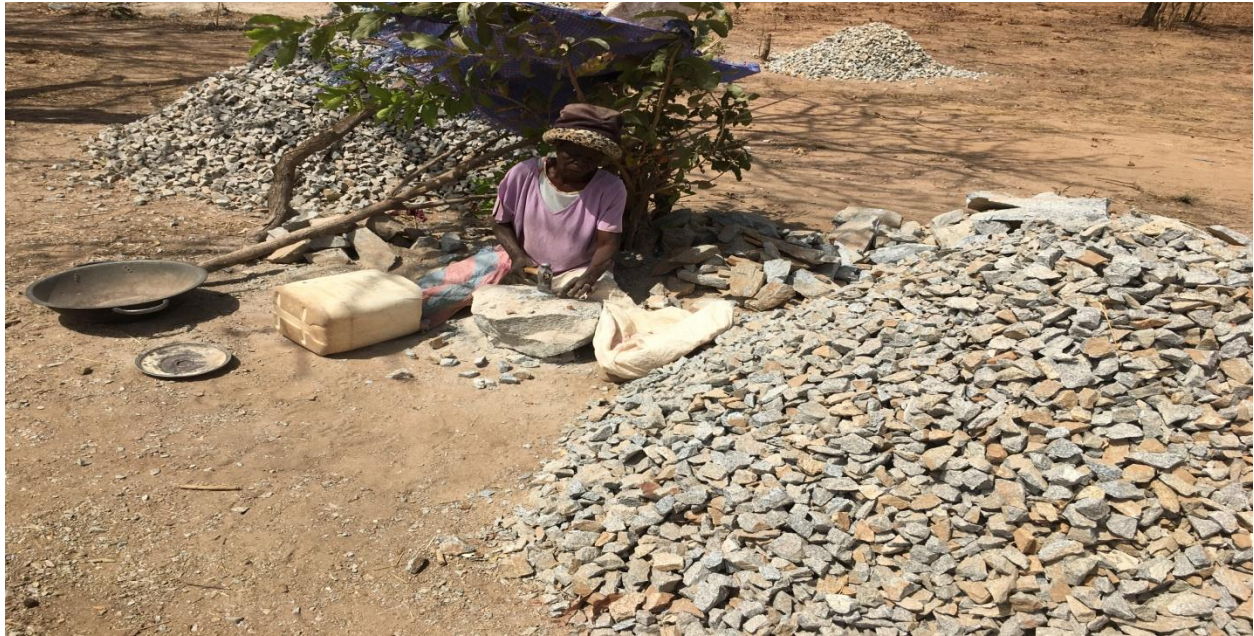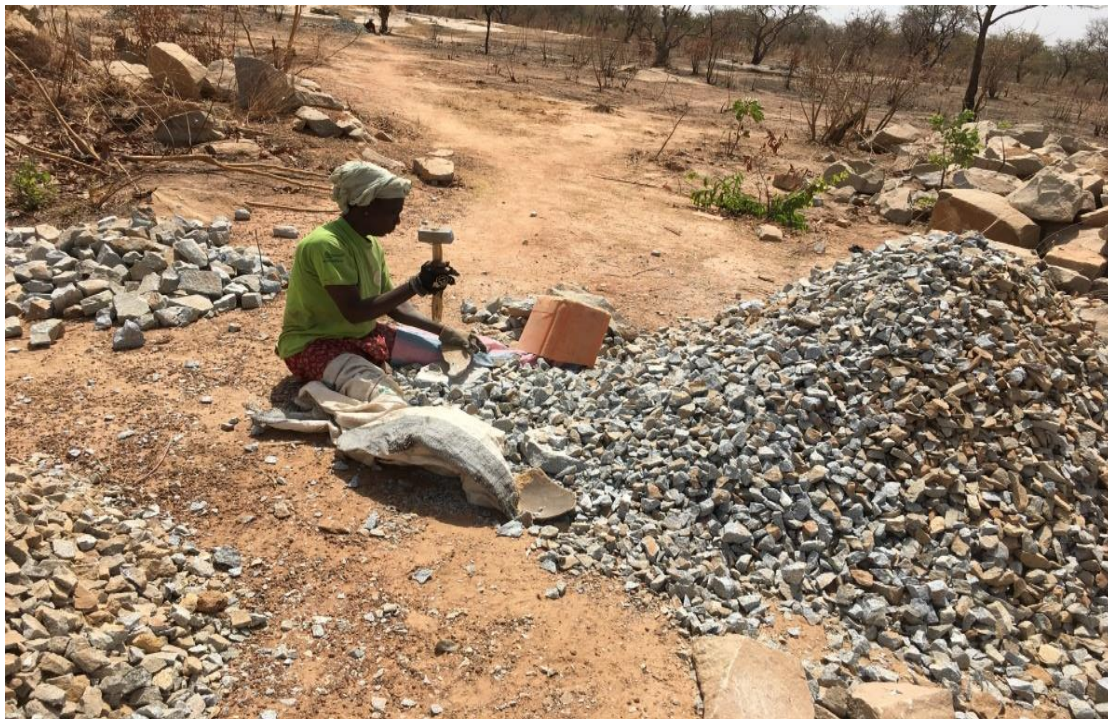

Infertile land abandoned for fallow

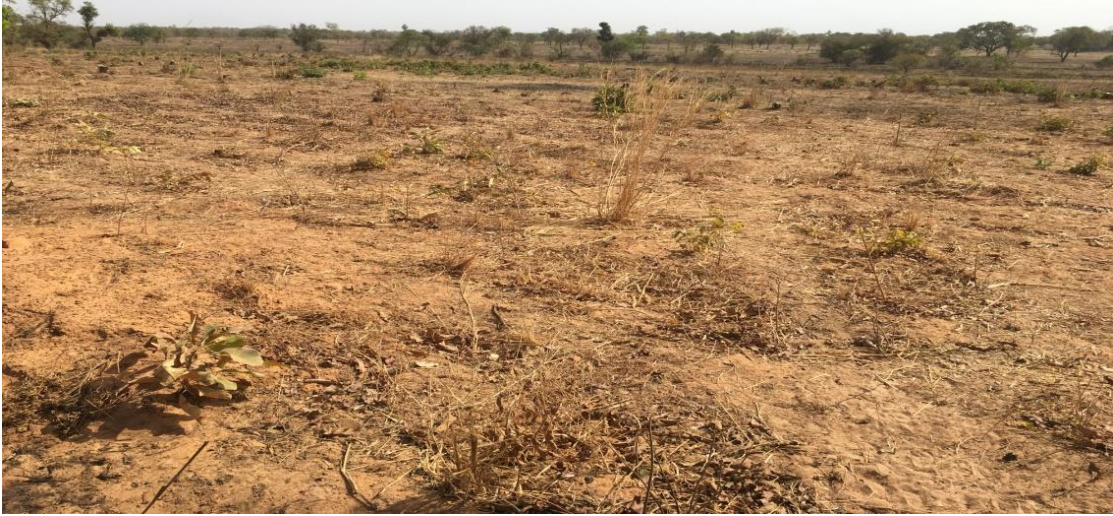

Poor dam protection against high temperature and evaporation

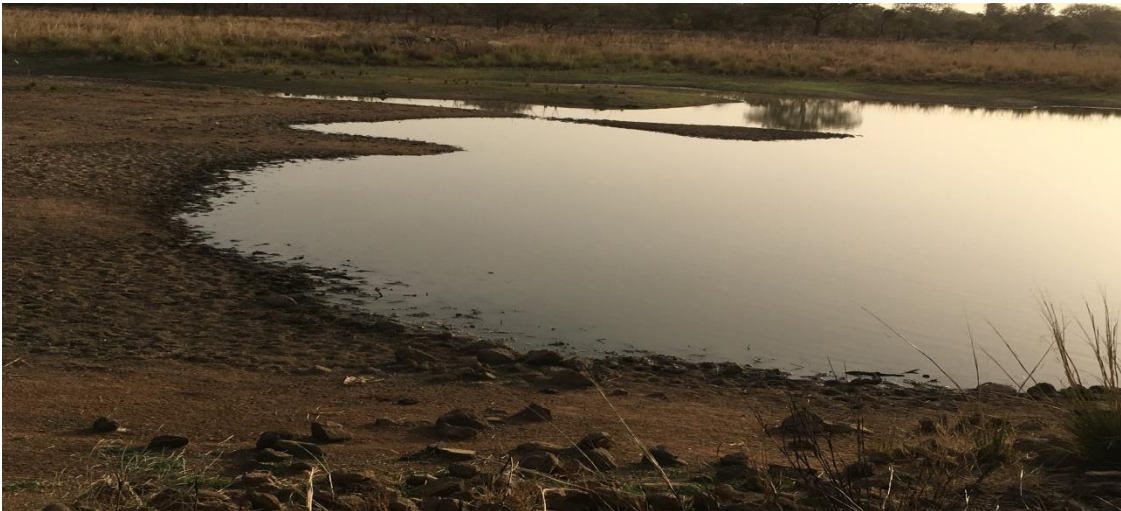

**Poor topography of the study area**

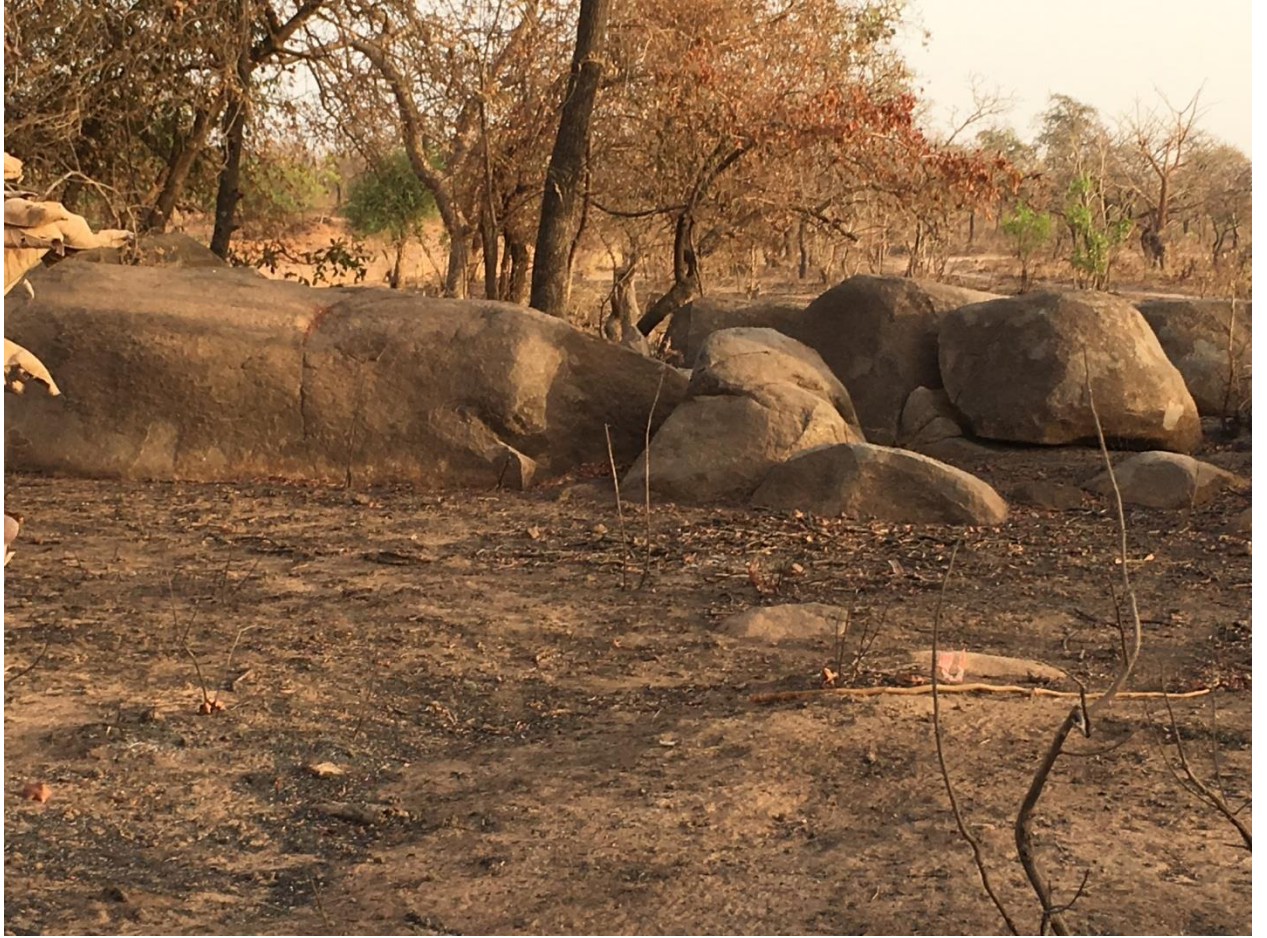

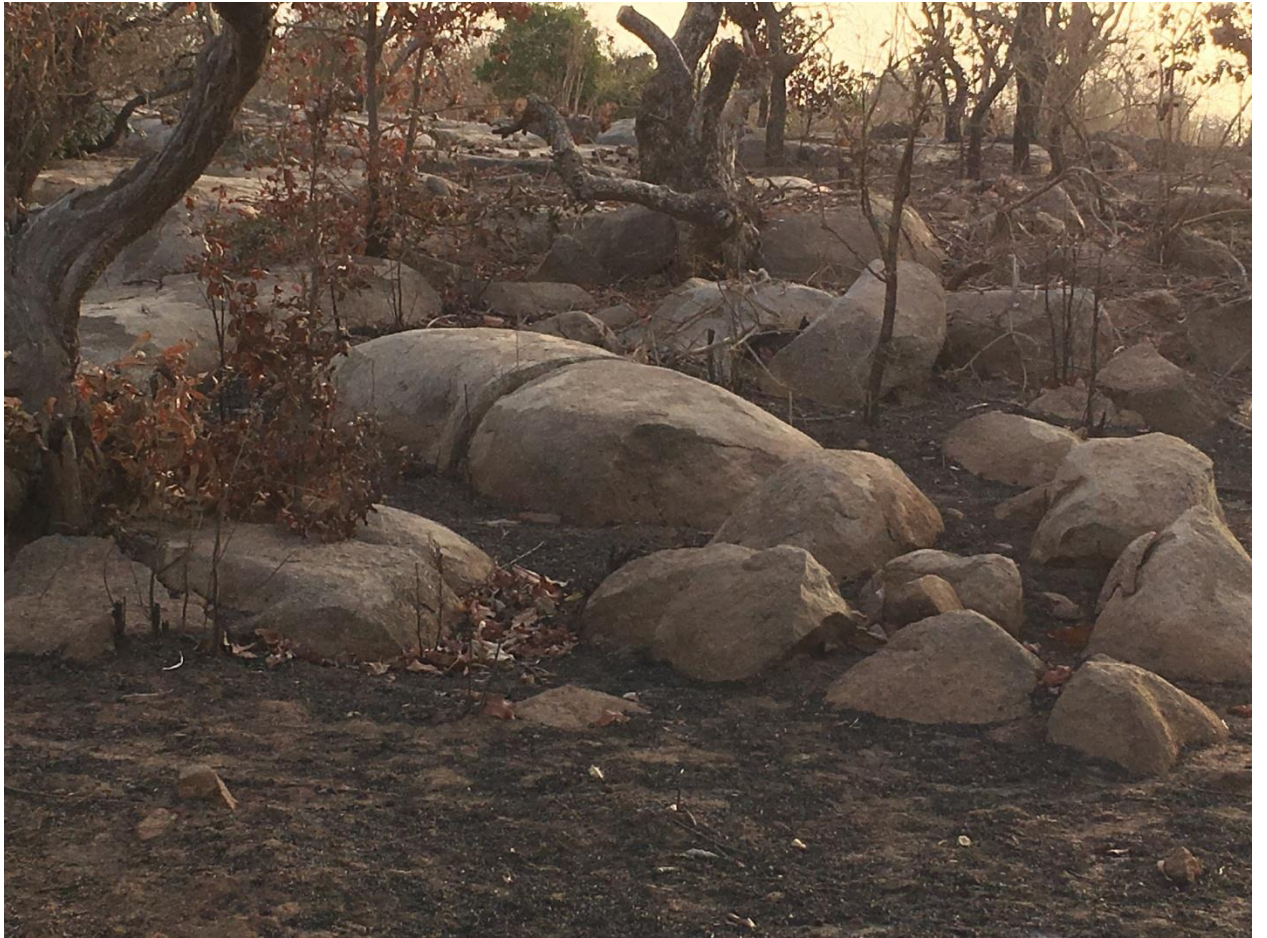

Supplement: Supplementary file 1 [file opag-2018-0057_sm.pdf]
